# Supplementary material for: Remarkable solar thermochemical CO2 splitting performances based on Ce- and Al-doped SrMnO3 perovskites
Source: Royal Society of Chemistry journal article supplement (doi:10.1039/d2se01496c), 2023-01-01
Supplement: d2se01496c1.pdf [file d2se01496c1.pdf]

## Remarkable Solar Thermochemical CO<sub>2</sub> Splitting Performances

### based on Ce- and Al- doped SrMnO<sub>3</sub> Perovskites

Ke Gao<sup>1</sup>, Xianglei Liu<sup>1,2,3\*</sup>, Qi Wang<sup>1</sup>, Zhixing Jiang<sup>1</sup>, Cheng Tian<sup>1</sup>, Nan Sun<sup>1</sup>,  
Yimin Xuan<sup>1,2,3</sup>

<sup>1</sup> School of Energy and Power Engineering, Nanjing University of Aeronautics and  
Astronautics, Nanjing, Jiangsu Province, 210016, China

<sup>2</sup> Key Laboratory of Thermal Management and Energy Utilization of Aviation  
Vehicles, Ministry of Industry and Information Technology,  
Nanjing, Jiangsu Province, 210016, China

<sup>3</sup> Integrated Energy Institute, Nanjing University of Aeronautics and  
Astronautics, Nanjing, Jiangsu Province, 210016, China

\*Corresponding author, E-mail: [xliu@nuaa.edu.cn](mailto:xliu@nuaa.edu.cn)

### This word file includes:

Fig. S1 Preparation procedures of perovskite powder samples.

Fig. S2 The convergence trend of total energy with different cutoff.

Fig. S3 Temperature varies with the concentration ratio for different samples.

Fig. S4 SEM images of remaining Ce- doped SrMnO<sub>3</sub> at A site.

Fig. S5 Particle size distribution of Ce- doped SrMnO<sub>3</sub> before and after cycles.

Fig. S6 The X-ray diffraction patterns of cycled Al- doped Sr<sub>0.6</sub>Ce<sub>0.4</sub>MnO<sub>3</sub>.

Fig. S7 XPS profile for (a) Ce 3d and (b) Al 2p spectra for SCMA20.

Fig. S8 Particle size distribution of Al- doped Sr<sub>0.6</sub>Ce<sub>0.4</sub>MnO<sub>3</sub> before and after cycles.

Fig. S9 SEM mapping of SCMA20 before and after cycling.

Fig. S10 The DFT calculation model for initial and final positions.

Fig. S11 Total CO<sub>2</sub> conversion rate and real-time O<sub>2</sub> production rate profiles for  
SCMA20 of 20 cycles.

Fig. S12 Particle size distribution of SCMA20 after 20 redox cycles.

Fig. S13 Temperature schemes designed for solar thermochemical CO<sub>2</sub> splitting  
within different reduction temperatures.

Fig. S14 The SEM image of SCMA20 at 1400 °C reduction temperature.

Tab. S1 Detail O<sub>2</sub> and CO yields of SCMA20 in last three cycles within different  
reduction temperatures.

Tab. S2 Detailed performance comparison of different redox powder materials in this

work with other literature reports.

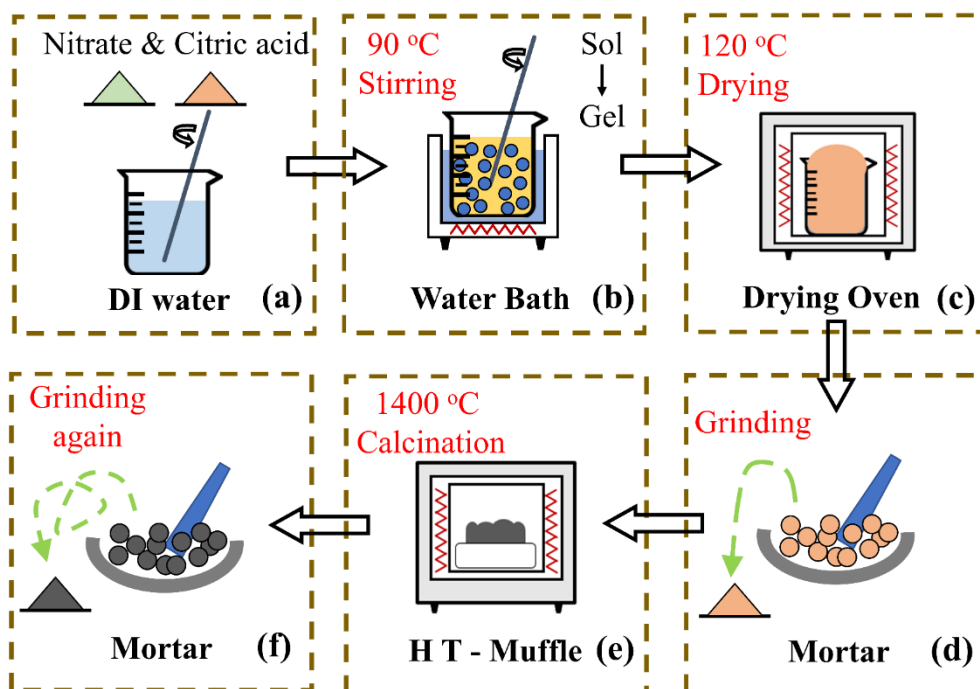

**Fig. S1** Preparation procedures of perovskite powder samples.

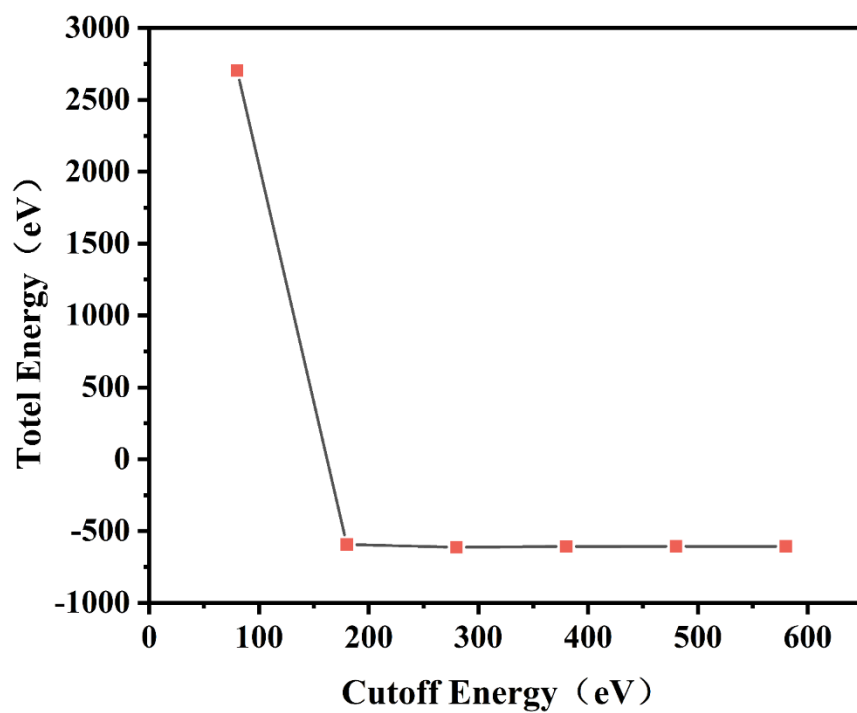

**Fig. S2** The convergence trend of total energy with different cutoff.

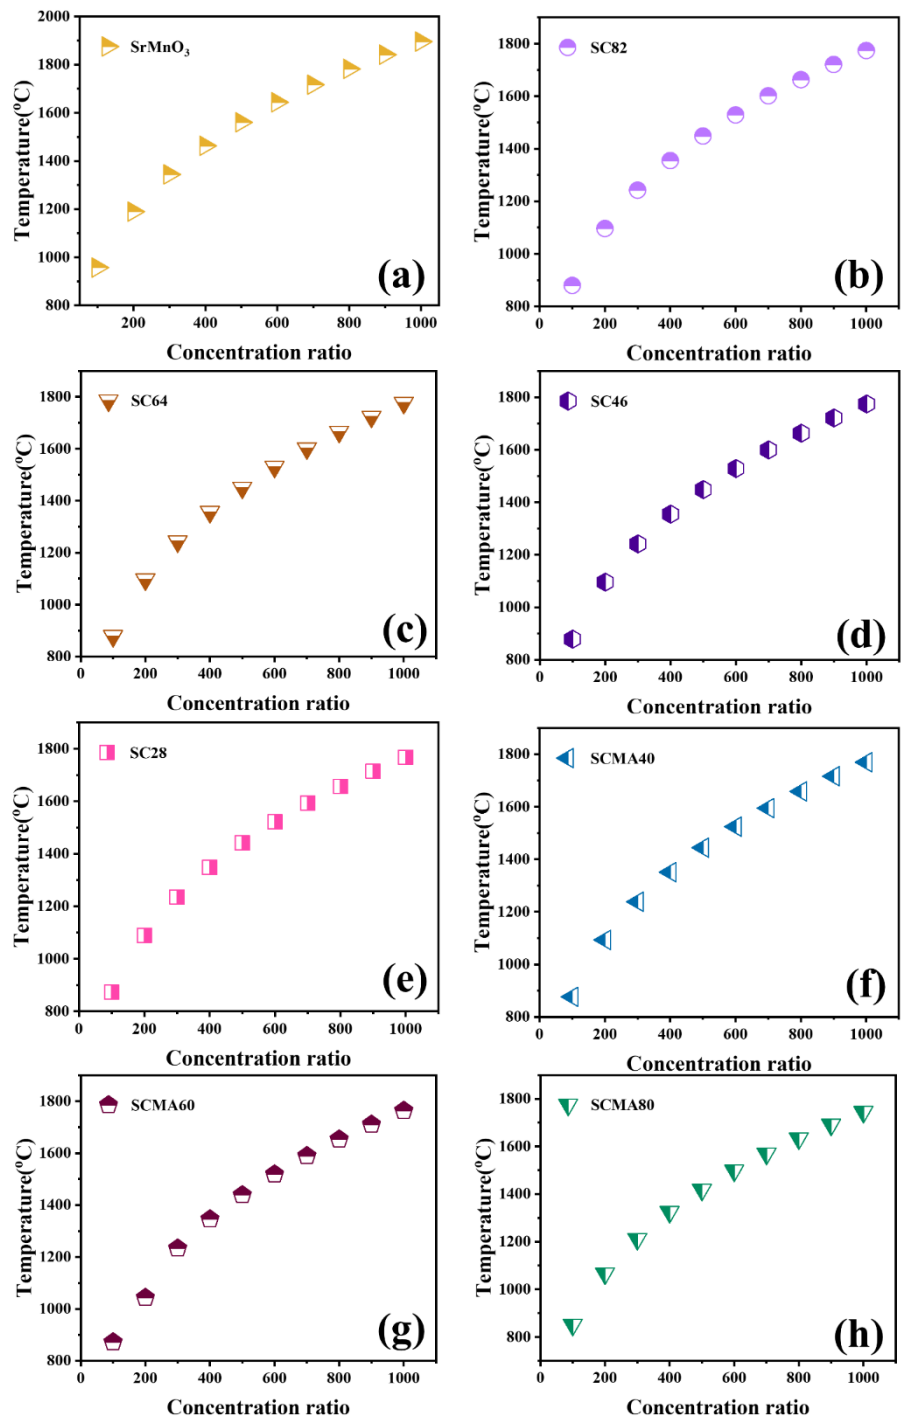

**Fig. S3** Temperature varies with the concentration ratio for different samples.

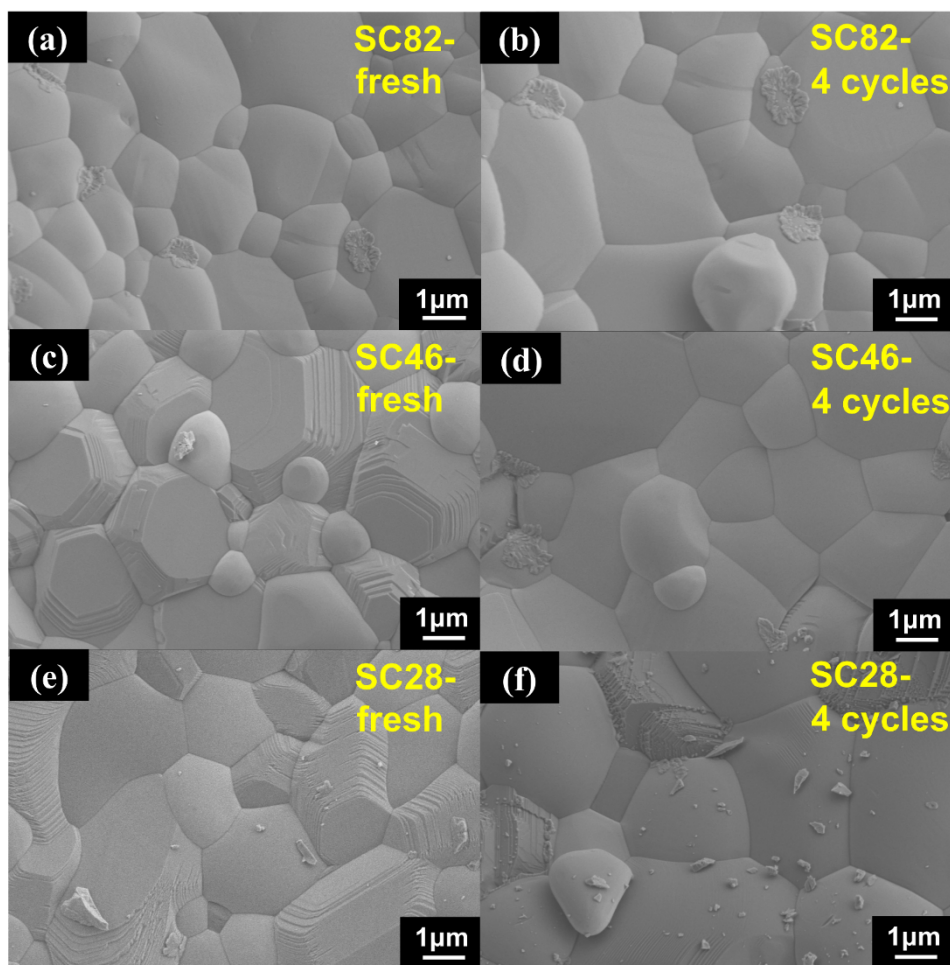

**Fig. S4** SEM images of remaining Ce- doped SrMnO<sub>3</sub> at A site.

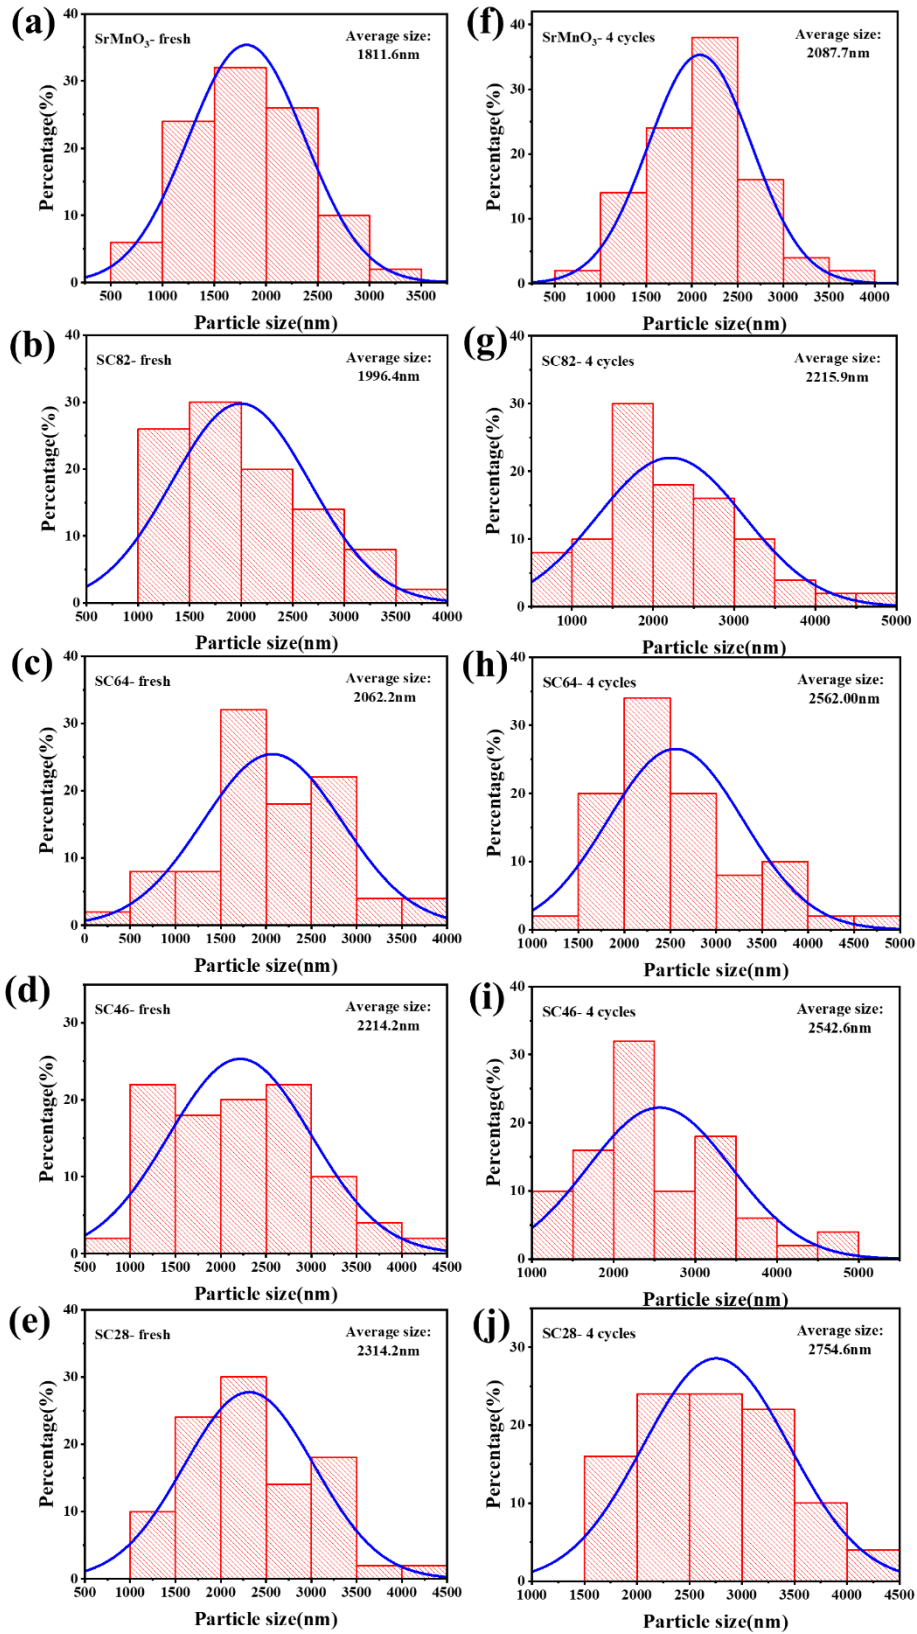

Fig. S5 Particle size distribution of Ce- doped SrMnO<sub>3</sub> before and after cycles.

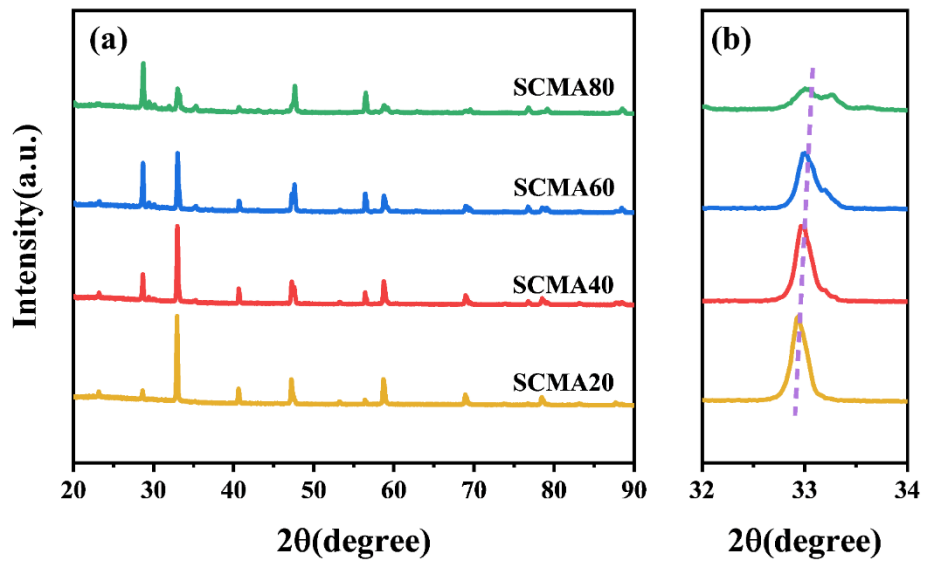

**Fig. S6** X-ray diffraction patterns of cycled Al- doped  $\text{Sr}_{0.6}\text{Ce}_{0.4}\text{MnO}_3$ .

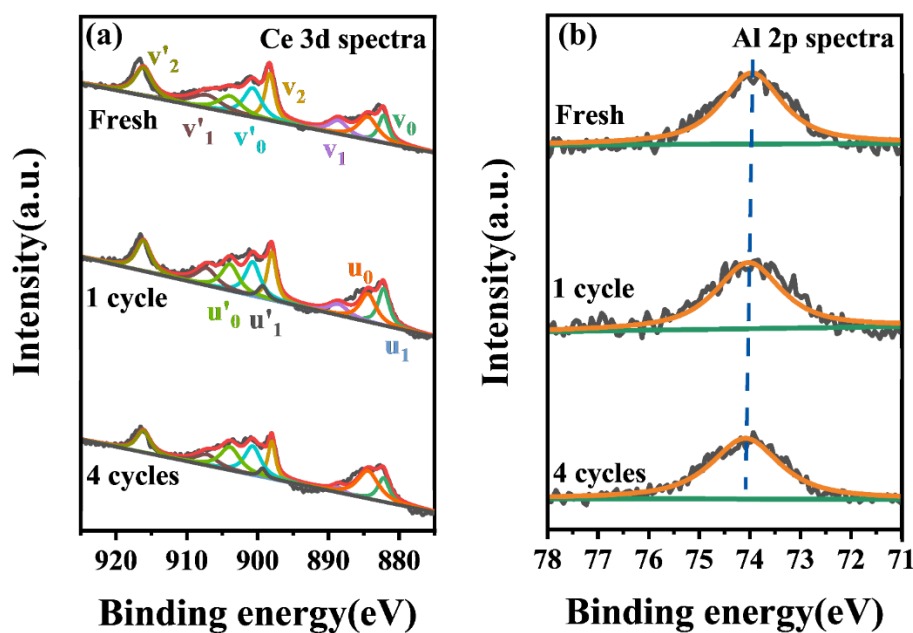

**Fig. S7** XPS profile for (a) Ce 3d and (b) Al 2p spectra for SCMA20.

Fig. S7a shows Ce 3d spectra of the fresh, after one cycle, and after four cycles for SCMA20. Ce 3d spectra (Ce 3d<sub>5/2</sub> and Ce 3d<sub>3/2</sub>) been divided into ten convolved peaks. Ce<sup>4+</sup> has been fitted with six peaks: v<sub>0</sub> (882.2 eV), v<sub>1</sub> (888.6 eV), v<sub>2</sub> (898 eV), v'<sub>0</sub> (900.7 eV), v'<sub>1</sub> (907.2 eV), and v'<sub>2</sub> (916.2 eV). Meanwhile, Ce<sup>3+</sup> has been fitted with four peaks: u<sub>0</sub> (884.4 eV), u<sub>1</sub> (880.6 eV), u'<sub>0</sub> (903.9 eV), and u'<sub>1</sub> (899.3 eV).<sup>1, 2</sup> It has been reported that the presence of Ce<sup>3+</sup> shows the formation of oxygen vacancies, and the number of Ce<sup>3+</sup> represents the concentration of oxygen vacancies in CeO<sub>2</sub>.<sup>3, 4</sup> By calculation, the concentration of Ce<sup>3+</sup> on SCMA20 is gradually increasing with the increase of cycle numbers, and the value of Ce<sup>3+</sup>/(Ce<sup>3+</sup> + Ce<sup>4+</sup>) increases from 0.26 to 0.30 to 0.41, showing oxygen vacancies increasing after cycling. This phenomenon can be attributed to the sample being exposed to high temperature. Meanwhile, as shown in Fig. S7b, the peak position of Al 2p is unchanged (around 74.1 eV) before and after cycling.<sup>5, 6</sup> Therefore, there is no obvious change of Al 2p spectra for SCMA20 after cycling, showing the good stability on SCMA20.

Reference :

- 1 E. Beche, P. Charvin, D. Perarnau, S. Abanades and G. Flamant, *Surf. Interface Anal.*, 2008, **40**, 264-267.



- 2 H. Shi, C. Tian, X. Liu and N. Sun et al., *Chem. Eng. J.*, 2023, **454**, 140063.
- 3 D. He, H. Hao, D. Chen, J. Liu, J. Yu, J. Lu, F. Liu, G. Wan, S. He, Y. Luo, *Catal. Today*, 2017, **281**, 559-565.
- 4 H. Ay, D. Üner, *Appl. Catal. B*, 2015, **179**, 128-138.
- 5 N.M. Figueiredo, N.J.M. Carvalho, A. Cavaleiro, *Appl. Surf. Sci.*, 2011, **257**, 5793-5798.
- 6 K.J. Kim, J.S. Jang, *Anal. Chem.*, 2009, **81**, 8519-8522.

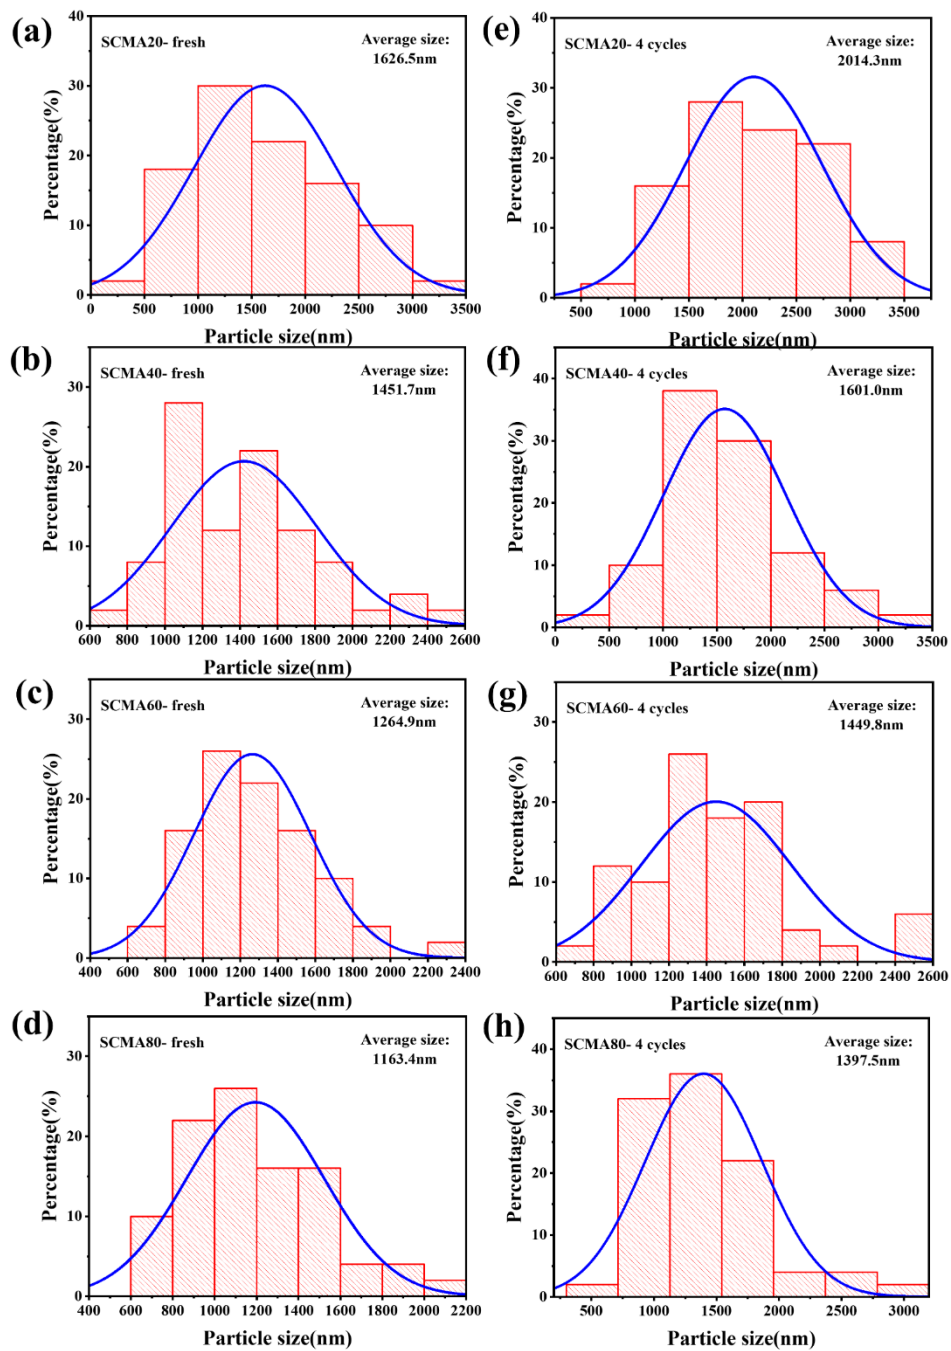

**Fig. S8** Particle size distribution of Al-doped  $\text{Sr}_{0.6}\text{Ce}_{0.4}\text{MnO}_3$  before and after cycles.

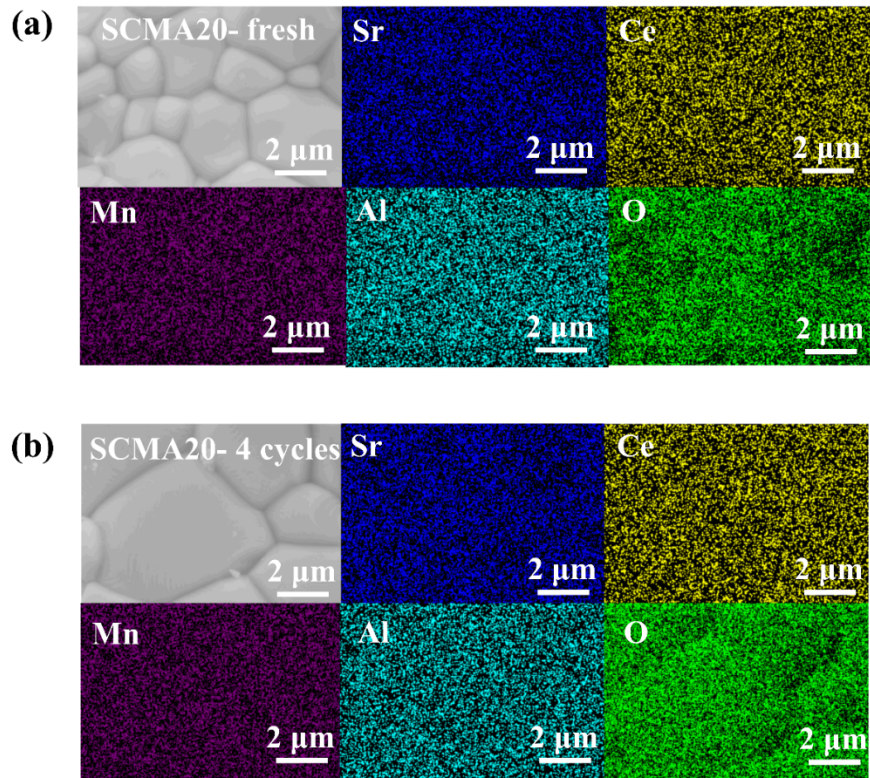

**Fig. S9** SEM mapping of SCMA20 before and after cycling.

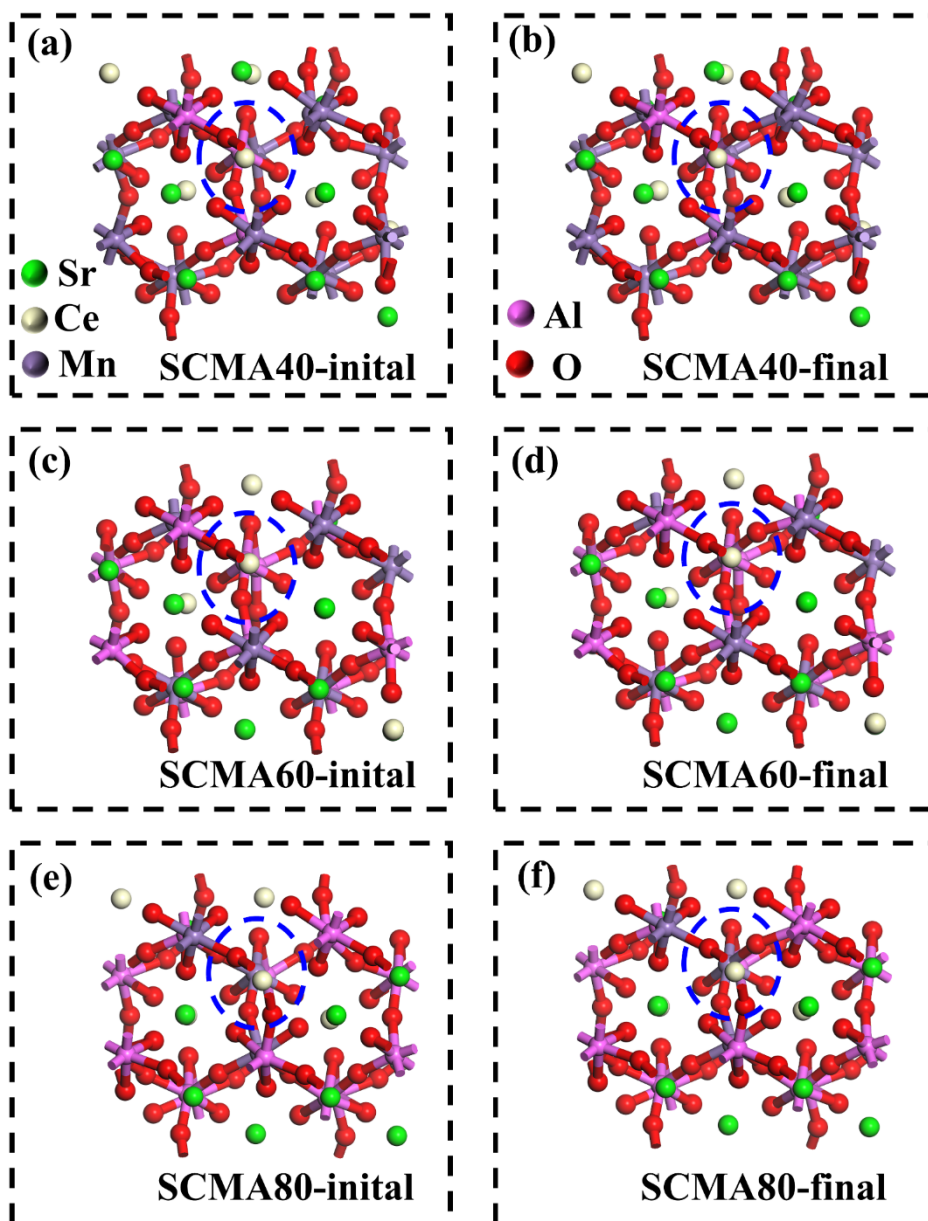

Fig. S10 The DFT calculation model for initial and final positions.

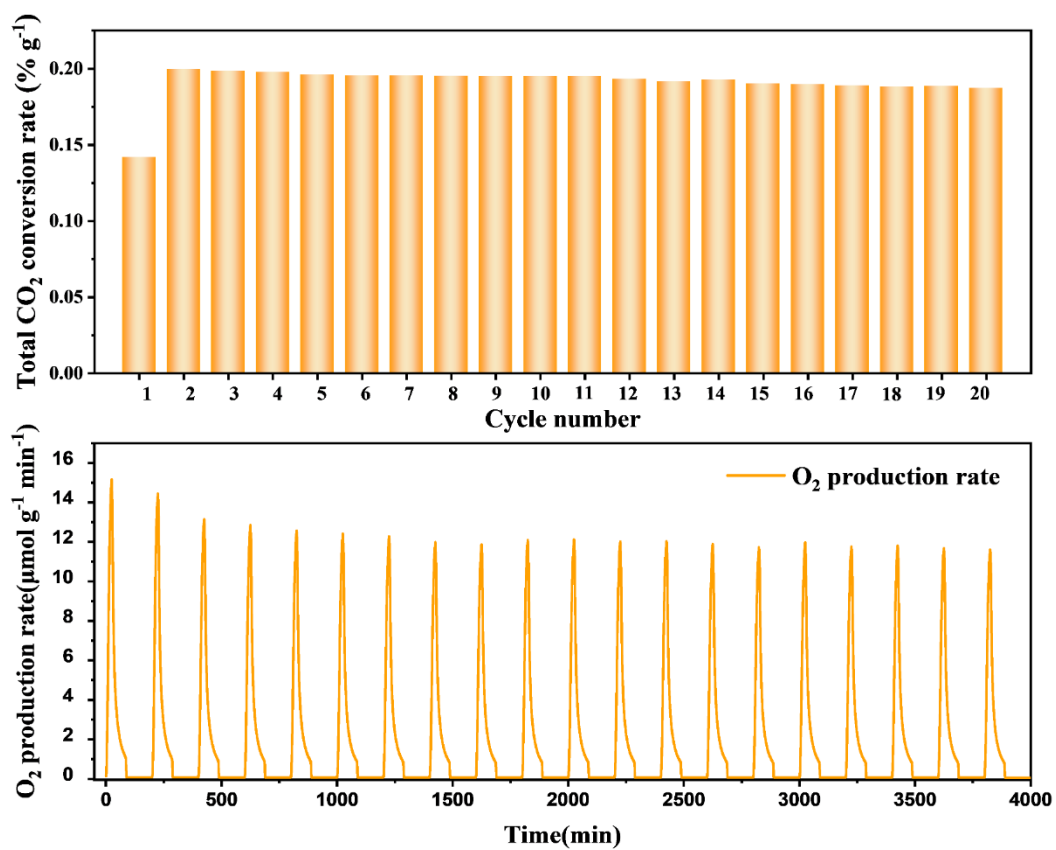

Fig.S11 (a) Total CO<sub>2</sub> conversion rate and real-time O<sub>2</sub> production rate profiles for SCMA20 of 20 cycles.

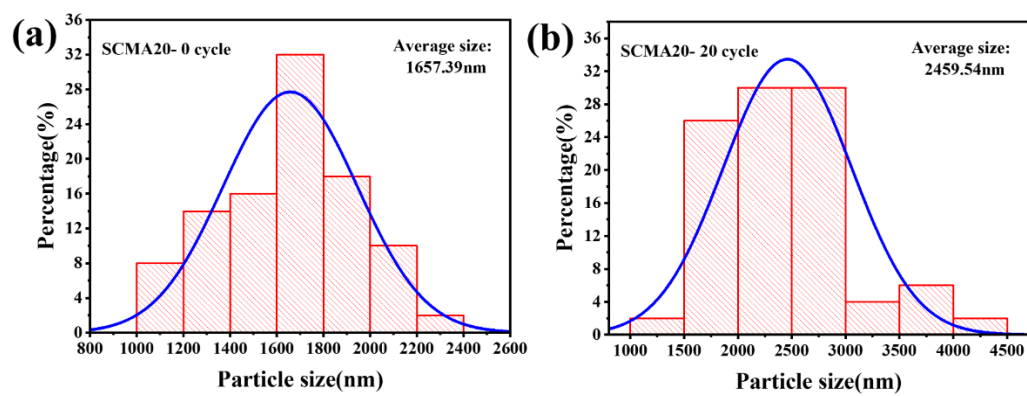

**Fig. S12** Particle size distribution of SCMA20 after 20 redox cycles.

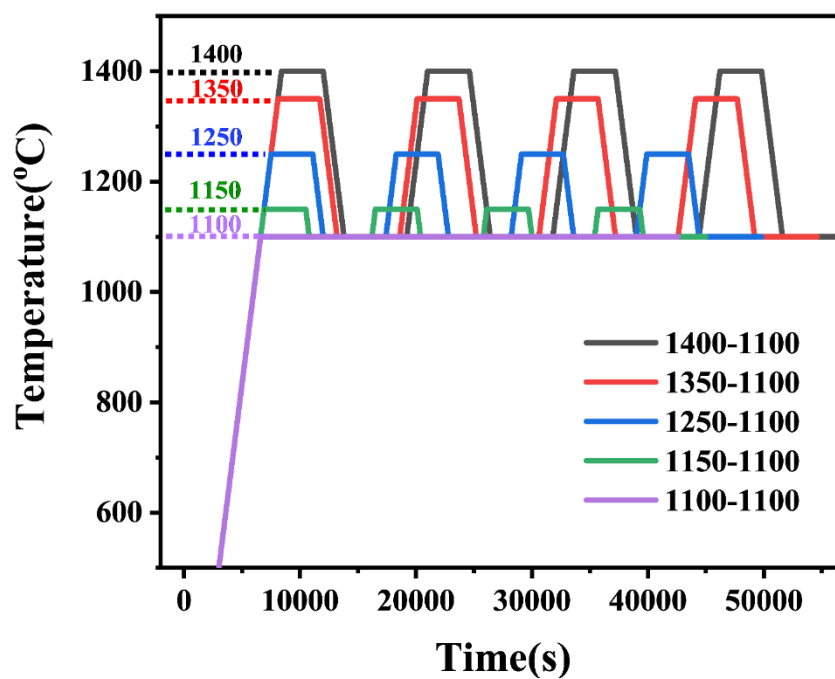

**Fig. S13** Temperature schemes designed for solar thermochemical CO<sub>2</sub> splitting within different reduction temperatures.

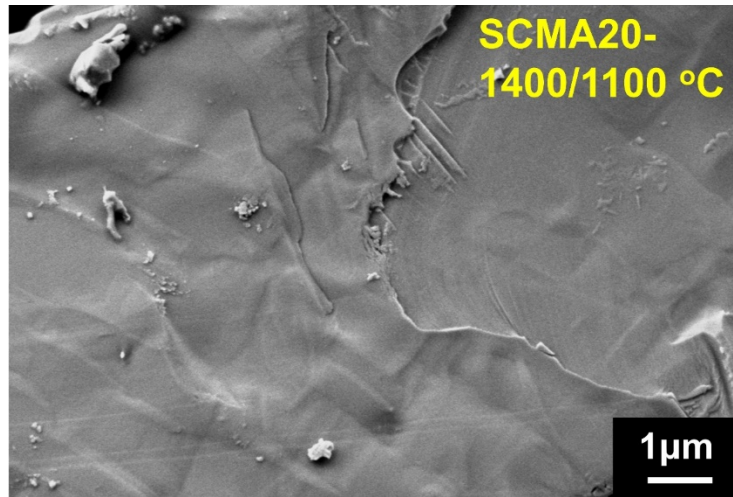

**Fig. S14** The SEM image of SCMA20 at 1400 °C reduction temperature.



**Tab. S1** Detail O<sub>2</sub> and CO yields of SCMA20 in last three cycles within different reduction temperatures.

| Reaction<br>Temperature<br>(°C) | Yield (μmol g <sup>-1</sup> ) |        |                |        |                |        |
|---------------------------------|-------------------------------|--------|----------------|--------|----------------|--------|
|                                 | Cycle 2                       |        | Cycle 3        |        | Cycle 4        |        |
|                                 | O <sub>2</sub>                | CO     | O <sub>2</sub> | CO     | O <sub>2</sub> | CO     |
| 1100-1100                       | 60.43                         | 73.31  | 54.74          | 80.06  | 52.82          | 80.84  |
| 1150-1100                       | 97.17                         | 142.29 | 84.94          | 145.09 | 82.61          | 145.72 |
| 1250-1100                       | 224.83                        | 403.69 | 208.41         | 399.17 | 205.93         | 396.91 |
| 1350-1100                       | 495.57                        | 801.27 | 452.66         | 798.34 | 443.93         | 798.39 |
| 1400-1100                       | 531.86                        | 650.26 | 473.21         | 698.61 | 432.96         | 674.71 |

The O<sub>2</sub> and CO yields remain basically stable over the last three cycles except for a slight swing for the first cycle. Thus, the total O<sub>2</sub> and CO yields in last three cycles are discussed and analyzed here.

**Tab. S2** Detailed performance comparison of different redox powder materials in this work with other literature reports.

| Materials                                                                  | $T_{\text{red}}$<br>(°C) | $T_{\text{ox}}$<br>(°C) | $\Delta T$<br>(°C) | CO yield<br>( $\mu\text{mol g}^{-1}$ ) | CO peak<br>production rate<br>( $\mu\text{mol g}^{-1} \text{s}^{-1}$ ) | Measurement<br>method | Cycle<br>number | Average solar<br>absorptance<br>(%) | Ref.      |
|----------------------------------------------------------------------------|--------------------------|-------------------------|--------------------|----------------------------------------|------------------------------------------------------------------------|-----------------------|-----------------|-------------------------------------|-----------|
| $\text{Sr}_{0.6}\text{Ce}_{0.4}\text{Mn}_{0.8}\text{Al}_{0.2}\text{O}_3$   | 1350                     | 1100                    | 250                | 799.34                                 | 0.607                                                                  | Direct                | 20              | 87.98                               | This work |
| $\text{La}_{0.6}\text{Ca}_{0.4}\text{Mn}_{0.8}\text{Ga}_{0.2}\text{O}_3$   | 1350                     | 1050                    | 300                | 513.00                                 | 0.464                                                                  | Direct                | 8               | 87.40                               | [35]      |
| $\text{La}_{0.6}\text{Sr}_{0.4}\text{Mn}_{0.25}\text{Cr}_{0.75}\text{O}_3$ | 1400                     | 1400                    | 0                  | 312.00                                 | 0.595                                                                  | Direct                | 15              | –                                   | [38]      |
| $\text{Sm}_{0.6}\text{Ca}_{0.4}\text{Mn}_{0.8}\text{Al}_{0.2}\text{O}_3$   | 1350                     | 1100                    | 250                | 595.56                                 | 0.446                                                                  | Direct                | 30              | 87.10                               | [47]      |
| $\text{Sm}_{0.6}\text{Sr}_{0.4}\text{MnO}_3$                               | 1300                     | 1300                    | 0                  | 376.10                                 | 0.089                                                                  | Direct                | 14              | 86.60                               | [49]      |
| $\text{LaF}_{0.75}\text{Co}_{0.25}\text{O}_3$                              | 1300                     | 1000                    | 300                | 117                                    | –                                                                      | TGA                   | 2               | –                                   | [10]      |
| $\text{La}_{0.5}\text{Sr}_{0.5}\text{Fe}_{0.5}\text{Mn}_{0.5}\text{O}_3$   | 1300                     | 1000                    | 300                | 107                                    | –                                                                      | TGA                   | 2               | –                                   | [10]      |
| $\text{La}_{0.5}\text{Sr}_{0.5}\text{Co}_{0.5}\text{Mn}_{0.5}\text{O}_3$   | 1300                     | 1050                    | 250                | 152.00                                 | –                                                                      | TGA                   | 2               | –                                   | [10]      |
| $\text{La}_{0.6}\text{Sr}_{0.4}\text{FeO}_3$                               | 1200                     | 1050                    | 150                | 53.00                                  | –                                                                      | TGA                   | 2               | –                                   | [10]      |
| $\text{SrFeO}_3$                                                           | 1200                     | 1000                    | 200                | 86.00                                  | –                                                                      | TGA                   | 2               | –                                   | [10]      |
| $\text{SrFeO}_3(\text{SFO-1})$                                             | 1100                     | 1000                    | 100                | 82.50                                  | –                                                                      | TGA                   | 2               | –                                   | [10]      |
| $\text{Ba}_{0.5}\text{Sr}_{0.5}\text{FeO}_3$                               | 1000                     | 1000                    | 0                  | 31.00                                  | –                                                                      | TGA                   | 2               | –                                   | [10]      |
| $\text{Y}_{0.5}\text{Sr}_{0.5}\text{MnO}_3$                                | 1400                     | 900                     | 500                | 757.00                                 | –                                                                      | TGA                   | 3               | –                                   | [19]      |
| $\text{Y}_{0.5}\text{Sr}_{0.5}\text{MnO}_3$                                | 1300                     | 900                     | 400                | 524.00                                 | –                                                                      | TGA                   | 3               | –                                   | [19]      |
| $\text{Y}_{0.5}\text{Ca}_{0.5}\text{MnO}_3$                                | 1400                     | 1100                    | 300                | 671.00                                 | –                                                                      | TGA                   | 3               | –                                   | [19]      |
| $\text{La}_{0.5}\text{Sr}_{0.5}\text{MnO}_3$                               | 1400                     | 1100                    | 300                | 325.00                                 | –                                                                      | TGA                   | 3               | –                                   | [20]      |
| $\text{SrMnO}_3$                                                           | 1250                     | 1000                    | 250                | 511.00                                 | –                                                                      | TGA                   | 5               | –                                   | [22]      |
| $\text{La}_{0.75}\text{Sr}_{0.25}\text{MnO}_3$                             | 1250                     | 1000                    | 250                | 311.00                                 | –                                                                      | TGA                   | 5               | –                                   | [22]      |
| $\text{LaMnO}_3$                                                           | 1000                     | 1000                    | 0                  | 223.90                                 | –                                                                      | TGA                   | 4               | –                                   | [22]      |
| $\text{La}_{0.5}\text{Sr}_{0.5}\text{MnO}_3$                               | 1000                     | 1000                    | 0                  | 76.30                                  | –                                                                      | TGA                   | 4               | –                                   | [22]      |

|                                                                          |      |      |     |         |       |     |    |   |      |
|--------------------------------------------------------------------------|------|------|-----|---------|-------|-----|----|---|------|
| $\text{La}_{0.5}\text{Sr}_{0.5}\text{MnO}_3$                             | 1000 | 700  | 300 | 134.00  | –     | TGA | 4  | – | [22] |
| $\text{La}_{0.6}\text{Sr}_{0.4}\text{Mn}_{0.4}\text{Al}_{0.6}\text{O}_3$ | 1350 | 1000 | 350 | 247.00  | 0.832 | TGA | 80 | – | [23] |
| $\text{CeO}_2$                                                           | 1400 | 1000 | 400 | 105.00  | –     | TGA | 3  | – | [24] |
| $\text{Ce}_{0.75}\text{Zr}_{0.25}\text{O}_2$                             | 1400 | 1050 | 350 | 323.90  | –     | TGA | 3  | – | [24] |
| $\text{CeO}_2$                                                           | 1300 | 800  | 500 | 55.86   | –     | TGA | 3  | – | [42] |
| $\text{La}_{0.9}\text{Sr}_{0.1}\text{CoO}_3$                             | 1300 | 800  | 500 | 90.56   | –     | TGA | 3  | – | [42] |
| $\text{LaCo}_{0.7}\text{Zr}_{0.3}\text{O}_3$                             | 1400 | 900  | 500 | 1066.60 | –     | TGA | 3  | – | [42] |

---
